# Supplementary material for: Impact of Delta SARS-CoV-2 Infection on Glucose Metabolism: Insights on Host Metabolism and Virus Crosstalk in a Feline Model
Source: MDPI journal article supplement (doi:10.3390/v16020295), 2024-02-15
Supplement: s1 [file s1]

**Table S1:** List of primers and probe sequences used for ddPCR.

| Oligo name           | Sequence                                       |
|----------------------|------------------------------------------------|
| 2019-nCoV_N1-Forward | GACCCCAAAATCAGCGAAAT                           |
| 2019-nCoV_N1-Reverse | TCTGGTTACTGCCAGTTGAATCTG                       |
| 2019-nCoV_N1-Probe   | /56-FAM/ACCCCGCAT/ZEN/TACGTTTGGTGGACC/3IABkFQ/ |
| 2019-nCoV_N2-Forward | TTACAAACATTGGCCGAAA                            |
| 2019-nCoV_N2-Reverse | GCGCGACATTCCGAAGAA                             |
| 2019-nCoV_N2-Probe   | /56-FAM/ACAATTTGC/ZEN/CCCCAGCGCTTCAG/3IABkFQ/  |
| RNAseP_Foward        | AGATTGACCTGCGAGCG                              |
| RNAseP_Reverse       | GAGCGGCTGTCTCCACAAGT                           |
| RNAseP_Probe         | /56-FAM/TTCTGACCT/ZEN/GAAGGCTCTGCGCG/3IABkFQ/  |
| ACE2 Forward         | ACGGAGGCGTAAGGATTT                             |
| ACE2 Reverse         | GTGTGGTAGTGGTTGGTATTG                          |
| ACE2 Probe           | CGGATCAGAAATCGAAGG-AAGAA                       |

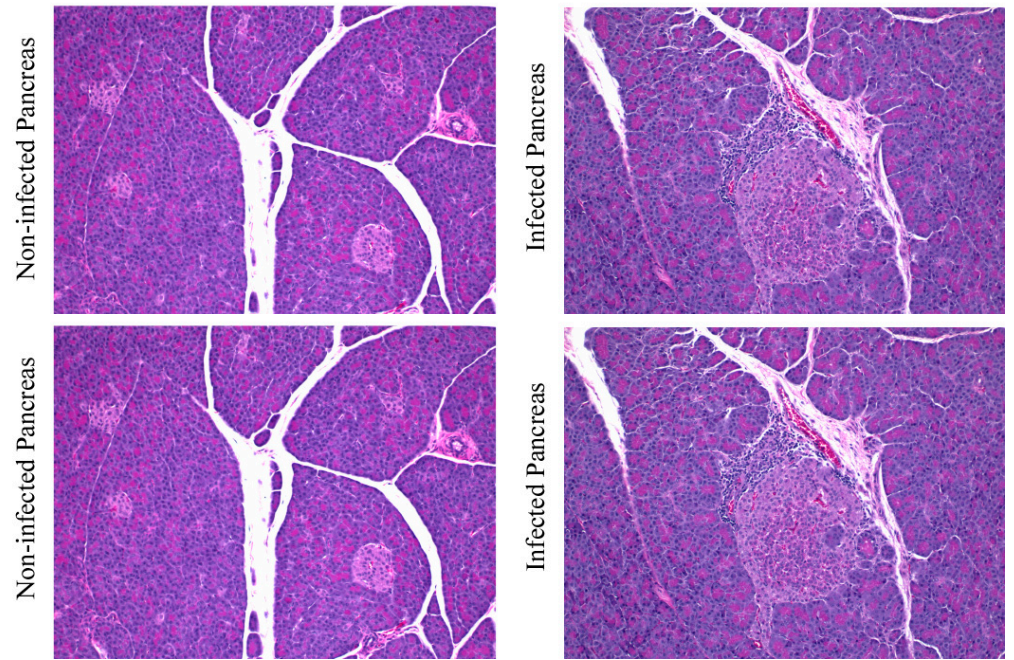

**Figure S1.** *Lymphoplasmacytic inflammation affecting one large islet at 12 dpi.* H&E images of pancreas tissue with islets from a healthy non-infected control cat (A) vs. one SARS-CoV-2-infected cat (B) that exhibited small lymphocytes and plasma cell infiltrates disrupting the normal architecture of a large islet at 12 dpi (B). No other histopathologic findings were observed in the pancreas of infected cats.
